# Supplementary material
Source: PubMed Central journal article supplement (PMC7467569)
Supplement: cb0c00220_si_001.pdf [file cb0c00220_si_001.pdf]

## Supporting Information

### **The progesterone 5 $\beta$ -reductase/iridoid synthase family is a catalytic reservoir for specialized metabolism across land plants**

Trinh-Don Nguyen<sup>1</sup> and Sarah E. O'Connor<sup>2\*</sup>

<sup>1</sup> Department of Chemistry, Irving K. Barber Faculty of Science, University of British Columbia

3247 University Way, Kelowna, BC, V1V 1V7 Canada

<sup>2</sup> Department of Natural Product Biosynthesis, Max Planck Institute for Chemical Ecology  
Hans-Knöll-Straße 8, 07745 Jena, Germany

oconnor@ice.mpg.de

**Table S1.** PRISE homologues described in this report.

| Species, family, order (lineage)                                             | Names: sequence ID*                                                                                                                                                                                                                                                                                              | Iridoids/cardenolides occurrence |
|------------------------------------------------------------------------------|------------------------------------------------------------------------------------------------------------------------------------------------------------------------------------------------------------------------------------------------------------------------------------------------------------------|----------------------------------|
| <i>Antirrhinum majus</i> , Plantaginaceae, Lamiales (core eudicot)           | <b>Antirrhinum_majus_1:</b> MF281392<br><b>Antirrhinum_majus_2:</b> MF281393<br><b>Antirrhinum_majus_3:</b> MF281394<br><b>Antirrhinum_majus_4:</b> MF281395                                                                                                                                                     | Iridoids <sup>1</sup>            |
| <i>Arabidopsis thaliana</i> , Brassicaceae, Brassicales (core eudicot)       | <b>Arabidopsis_thaliana_1</b> (At4g24220): BT008479<br><b>Arabidopsis_thaliana_2</b> (At5g58750): BT029538                                                                                                                                                                                                       |                                  |
| <i>Amborella trichopoda</i> , Amborellaceae, Amborellales (basal angiosperm) | <b>Amborella_trichopoda_1:</b> XM_006841525<br><b>Amborella_trichopoda_2:</b> XM_006848150<br><b>Amborella_trichopoda_3:</b> XM_006847811                                                                                                                                                                        |                                  |
| <i>Bupleurum falcatum</i> , Apiaceae, Apiales (core eudicot)                 | <b>Bupleurum_falcatum:</b> JX673780                                                                                                                                                                                                                                                                              |                                  |
| <i>Beta vulgaris</i> , Amaranthaceae, Caryophyllales (core eudicot)          | <b>Beta_vulgaris_1:</b> XM_010675329<br><b>Beta_vulgaris_2:</b> XM_010689225<br><b>Beta_vulgaris_3:</b> XM_010673358<br><b>Beta_vulgaris_4:</b> XM_010687262<br><b>Beta_vulgaris_5:</b> XM_010673632                                                                                                             |                                  |
| <i>Camptotheca acuminata</i> , Nyssaceae, Cornales (core eudicot)            | <b>Camptotheca_acuminata_1:</b> KU842378<br><b>Camptotheca_acuminata_2:</b> KU842379                                                                                                                                                                                                                             | Iridoids <sup>2</sup>            |
| <i>Citrus clementina</i> , Rutaceae, Sapindales (core eudicot)               | <b>Citrus_clementina_1:</b> XM_006433044<br><b>Citrus_clementina_2:</b> XM_006433538<br><b>Citrus_clementina_3:</b> XM_006432463<br><b>Citrus_clementina_4:</b> XM_006432455<br><b>Citrus_clementina_5:</b> XM_006442983<br><b>Citrus_clementina_6:</b> XM_006442984<br><b>Citrus_clementina_7:</b> XM_006424996 |                                  |
| <i>Cryptomeria japonica</i> , Cupressaceae, Pinales (gymnosperm)             | <b>Cryptomeria_japonica_1:</b> AK406828<br><b>Cryptomeria_japonica_2:</b> AK406861<br><b>Cryptomeria_japonica_3:</b> AK415075<br><b>Cryptomeria_japonica_4:</b> AK416036                                                                                                                                         |                                  |
| <i>Cucumis melo</i> , Cucurbitaceae, Cucurbitales (core eudicot)             | <b>Cucumis_melo_1:</b> XM_008459154<br><b>Cucumis_melo_2:</b> XM_008449152                                                                                                                                                                                                                                       |                                  |
| <i>Catharanthus roseus</i> , Apocynaceae, Gentianales (core eudicot)         | <b>Catharanthus_roseus_1:</b> KJ873882<br><b>Catharanthus_roseus_2:</b> KJ873883<br><b>Catharanthus_roseus_3:</b> KJ873884<br><b>Catharanthus_roseus_4:</b> KJ873885<br><b>Catharanthus_roseus_5:</b> KJ873886 (ISY)<br><b>Catharanthus_roseus_6:</b> KJ873887                                                   | Iridoids <sup>3</sup>            |
| <i>Coccomyxa subellipsoidea</i> , Coccomyxaceae (green alga)                 | <b>Coccomyxa_subellipsoidea:</b> XM_005645604                                                                                                                                                                                                                                                                    |                                  |
| <i>Dendrobium catenatum</i> , Orchidaceae, Asparagales (monocot)             | <b>Dendrobium_catenatum_1:</b> XM_020838092<br><b>Dendrobium_catenatum_2:</b> XM_020848973                                                                                                                                                                                                                       |                                  |
| <i>Diphasiastrum digitatum</i> , Lycopodiaceae, Lycopodiales (lycophyte)     | <b>Diphasiastrum_digitatum_1:</b> WAFT-2005045 <sup>1</sup><br><b>Diphasiastrum_digitatum_2:</b> WAFT-2014713 <sup>1</sup><br><b>Diphasiastrum_digitatum_3:</b> WAFT-2013184 <sup>1</sup>                                                                                                                        |                                  |
| <i>Digitalis lanata</i> , Plantaginaceae, Lamiales (core eudicot)            | <b>Digitalis_lanata_1:</b> AY585867<br><b>Digitalis_lanata_2:</b> HM210089                                                                                                                                                                                                                                       | Cardenolides <sup>4</sup>        |
| <i>Digitalis purpurea</i> , Plantaginaceae, Lamiales (core eudicot)          | <b>Digitalis_purpurea_1:</b> AJ310673<br><b>Digitalis_purpurea_2:</b> GU062787                                                                                                                                                                                                                                   |                                  |
| <i>Erysimum crepidifolium</i> , Brassicaceae, Brassicales (core eudicot)     | <b>Erysimum_crepidifolium_1:</b> ADG56544 (GU354236)<br><b>Erysimum_crepidifolium_2:</b> KF234078                                                                                                                                                                                                                | Cardenolides <sup>5</sup>        |
| <i>Gossypium raimondii</i> , Malvaceae, Malvales (core eudicot)              | <b>Gossypium_raimondii_1:</b> XM_012589862<br><b>Gossypium_raimondii_2:</b> XM_012589863<br><b>Gossypium_raimondii_3:</b> XM_012627262<br><b>Gossypium_raimondii_4:</b> XM_012624714<br><b>Gossypium_raimondii_5:</b> XM_012583385                                                                               |                                  |
| <i>Isoetes tegetiformans</i> , Isoetaceae, Isoetales (lycophyte)             | <b>Isoetes_tegetiformans_1:</b> PKOX-2097590 <sup>1</sup><br><b>Isoetes_tegetiformans_2:</b> PKOX-2098237 <sup>1</sup>                                                                                                                                                                                           |                                  |
| <i>Lactuca sativa</i> , Asteraceae, Asterales (core eudicot)                 | <b>Lactuca_sativa_1:</b> XM_023873729<br><b>Lactuca_sativa_2:</b> XM_023881031<br><b>Lactuca_sativa_3:</b> XM_023890552<br><b>Lactuca_sativa_4:</b> XM_023900544<br><b>Lactuca_sativa_5:</b> XM_023900546<br><b>Lactuca_sativa_6:</b> XM_023902925<br><b>Lactuca_sativa_7:</b> XM_023876481                      |                                  |
| <i>Musa acuminata</i> , Musaceae, Zingiberales (monocot)                     | <b>Musa_acuminata_1:</b> XM_009407733<br><b>Musa_acuminata_2:</b> XM_009398620<br><b>Musa_acuminata_3:</b> XM_009404020                                                                                                                                                                                          |                                  |
| <i>Mentha x piperita</i> , Lamiaceae, Lamiales (core eudicot)                | <b>Mentha_piperita:</b> GU451677                                                                                                                                                                                                                                                                                 |                                  |

|                                                                               |                                                                                                                                                                                                                                                                                                                                                                                                                                                                                                                                                           |                       |
|-------------------------------------------------------------------------------|-----------------------------------------------------------------------------------------------------------------------------------------------------------------------------------------------------------------------------------------------------------------------------------------------------------------------------------------------------------------------------------------------------------------------------------------------------------------------------------------------------------------------------------------------------------|-----------------------|
| <i>Marchantia polymorpha</i> , Marchantiaceae, Marchantiales (bryophyte)      | <b>Marchantia polymorpha</b> : Mapoly0190s0002 <sup>2</sup>                                                                                                                                                                                                                                                                                                                                                                                                                                                                                               |                       |
| <i>Medicago truncatula</i> , Fabaceae, Fabales (core eudicot)                 | <b>Medicago truncatula_1</b> : XM_013606299<br><b>Medicago truncatula_2</b> : XM_013606297<br><b>Medicago truncatula_3</b> : XM_003609687<br><b>Medicago truncatula_4</b> : XM_003609689                                                                                                                                                                                                                                                                                                                                                                  |                       |
| <i>Nelumbo nucifera</i> , Nelumbonaceae, Proteales (eudicot)                  | <b>Nelumbo nucifera_1</b> : XM_010273442<br><b>Nelumbo nucifera_2</b> : XM_010278835<br><b>Nelumbo nucifera_3</b> : XM_010261051<br><b>Nelumbo nucifera_4</b> : XM_010274509<br><b>Nelumbo nucifera_5</b> : XR_737103                                                                                                                                                                                                                                                                                                                                     |                       |
| <i>Nepeta cataria</i> , Lamiaceae, Lamiales (core eudicot)                    | <b>Nepeta cataria_1</b> : KY882233<br><b>Nepeta cataria_2</b> : KY882234                                                                                                                                                                                                                                                                                                                                                                                                                                                                                  | Iridoids <sup>6</sup> |
| <i>Olea europaea</i> , Oleaceae, Lamiales (core eudicot)                      | <b>Olea europaea_1</b> : KT954038 (ISY)<br><b>Olea europaea_2</b> : KT954040                                                                                                                                                                                                                                                                                                                                                                                                                                                                              | Iridoids <sup>7</sup> |
| <i>Phaeoceros carolinianus</i> , Notothyladaceae, Notothyladales (bryophyte)  | <b>Phaeoceros carolinianus_1</b> : RXRQ-2018832 <sup>1</sup><br><b>Phaeoceros carolinianus_2</b> : RXRQ-2138560 <sup>1</sup>                                                                                                                                                                                                                                                                                                                                                                                                                              |                       |
| <i>Pellia epiphylla</i> , Pelliaceae, Metzgeriales (bryophyte)                | <b>Pellia epiphylla_1</b> : PIUF-2092008 <sup>1</sup><br><b>Pellia epiphylla_2</b> : PIUF-2012430 <sup>1</sup>                                                                                                                                                                                                                                                                                                                                                                                                                                            |                       |
| <i>Picea glauca</i> , Pinaceae, Pinales (gymnosperm)                          | <b>Picea glauca_1</b> : BT118472<br><b>Picea glauca_2</b> : BT111670<br><b>Picea glauca_3</b> : BT111257                                                                                                                                                                                                                                                                                                                                                                                                                                                  |                       |
| <i>Physcomitrella patens</i> , Funariaceae, Funariales (bryophyte)            | <b>Physcomitrella patens</b> : XM_001754153                                                                                                                                                                                                                                                                                                                                                                                                                                                                                                               |                       |
| <i>Ricinus communis</i> , Euphorbiaceae, Malpighiales (core eudicot)          | <b>Ricinus communis_1</b> : XM_002510077<br><b>Ricinus communis_2</b> : KP282668<br><b>Ricinus communis_3</b> : XM_002518611<br><b>Ricinus communis_4</b> : XM_002525592                                                                                                                                                                                                                                                                                                                                                                                  |                       |
| <i>Sesamum indicum</i> , Pedaliaceae, Lamiales (core eudicot)                 | <b>Sesamum indicum_1</b> : XM_011071474<br><b>Sesamum indicum_2</b> : XM_011094221<br><b>Sesamum indicum_3</b> : XM_011071475<br><b>Sesamum indicum_4</b> : XM_011089881<br><b>Sesamum indicum_5</b> : XM_011082559                                                                                                                                                                                                                                                                                                                                       | Iridoids <sup>8</sup> |
| <i>Selaginella moellendorffii</i> , Selaginellaceae, Selaginiales (lycophyte) | <b>Selaginella moellendorffii_1</b> : XM_002967475<br><b>Selaginella moellendorffii_2</b> : XM_002960044<br><b>Selaginella moellendorffii_3</b> : XM_002991948<br><b>Selaginella moellendorffii_4</b> : XM_002989781<br><b>Selaginella moellendorffii_5</b> : XM_002960137<br><b>Selaginella moellendorffii_6</b> : XM_002969631<br><b>Selaginella moellendorffii_7</b> : XM_002960138<br><b>Selaginella moellendorffii_8</b> : XM_002981242<br><b>Selaginella moellendorffii_9</b> : XM_002989782<br><b>Selaginella moellendorffii_10</b> : XM_002984001 |                       |
| <i>Sorghum bicolor</i> , Poaceae, Poales (monocot)                            | <b>Sorghum bicolor_1</b> : XM_002465047<br><b>Sorghum bicolor_2</b> : XM_002449218<br><b>Sorghum bicolor_3</b> : XM_002467624                                                                                                                                                                                                                                                                                                                                                                                                                             |                       |
| <i>Vitis vinifera</i> , Vitaceae, Vitales (core eudicot)                      | <b>Vitis vinifera_1</b> : XM_002272235<br><b>Vitis vinifera_2</b> : FQ381232<br><b>Vitis vinifera_3</b> : XM_002276123<br><b>Vitis vinifera_4</b> : XM_002277929                                                                                                                                                                                                                                                                                                                                                                                          |                       |

\* All sequence accession (ID) numbers are from GenBank unless otherwise indicated.

<sup>1</sup> Sequences from the IKP Project<sup>9</sup>

<sup>2</sup> Sequence from the *Marchantia polymorpha* genome database<sup>10</sup>

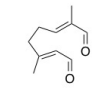

8-oxogeraniol

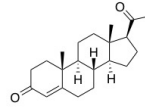

progesterone

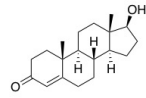

testosterone

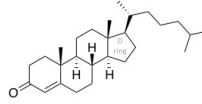

cholest-4-en-3-one

**Figure S1.** Substrates used in enzyme assays with PRISEs.

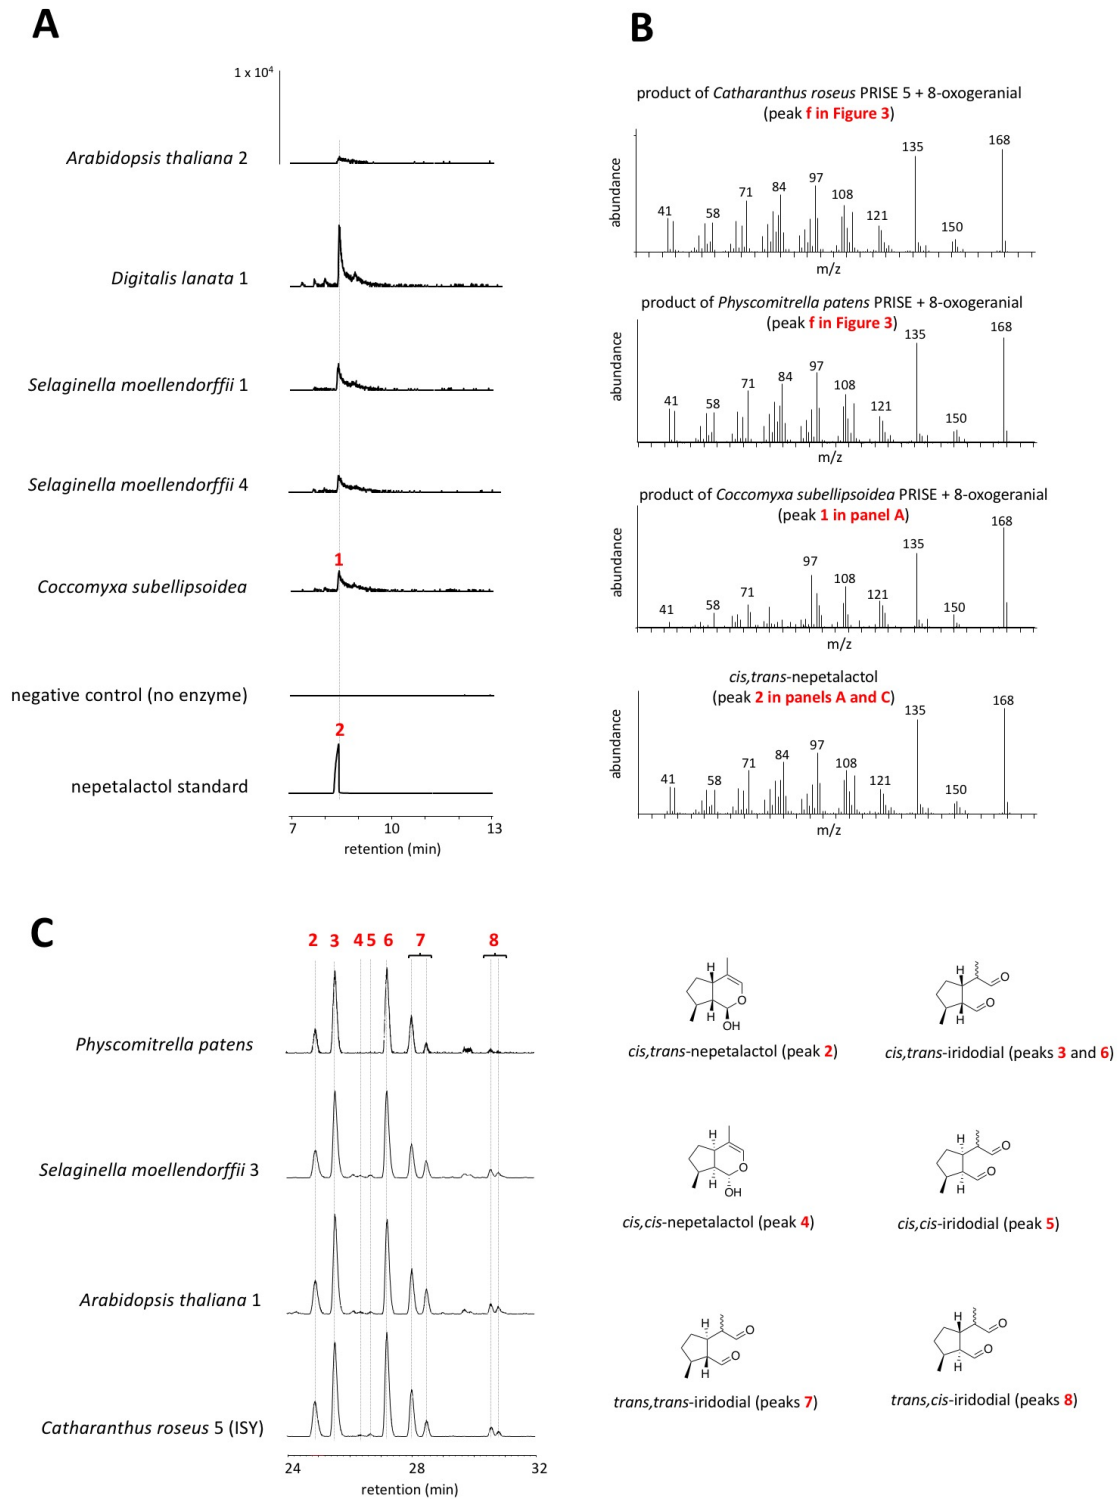

B: EI mass spectrum comparison between authentic standard of nepetalactol, major product from the previously-characterized iridoid synthase from *Catharanthus roseus*,<sup>11</sup> and products from selected PRISEs in this study.

C: GC-MS chromatogram using the chiral column (Supelco,  $\beta$ -DEX 225, 30 m x 250  $\mu$ m x 0.25  $\mu$ m) and method as described by Kries and co-workers<sup>12</sup> to compare product profiles of 8-oxogeranial reduction by selected PRISEs across land plants.

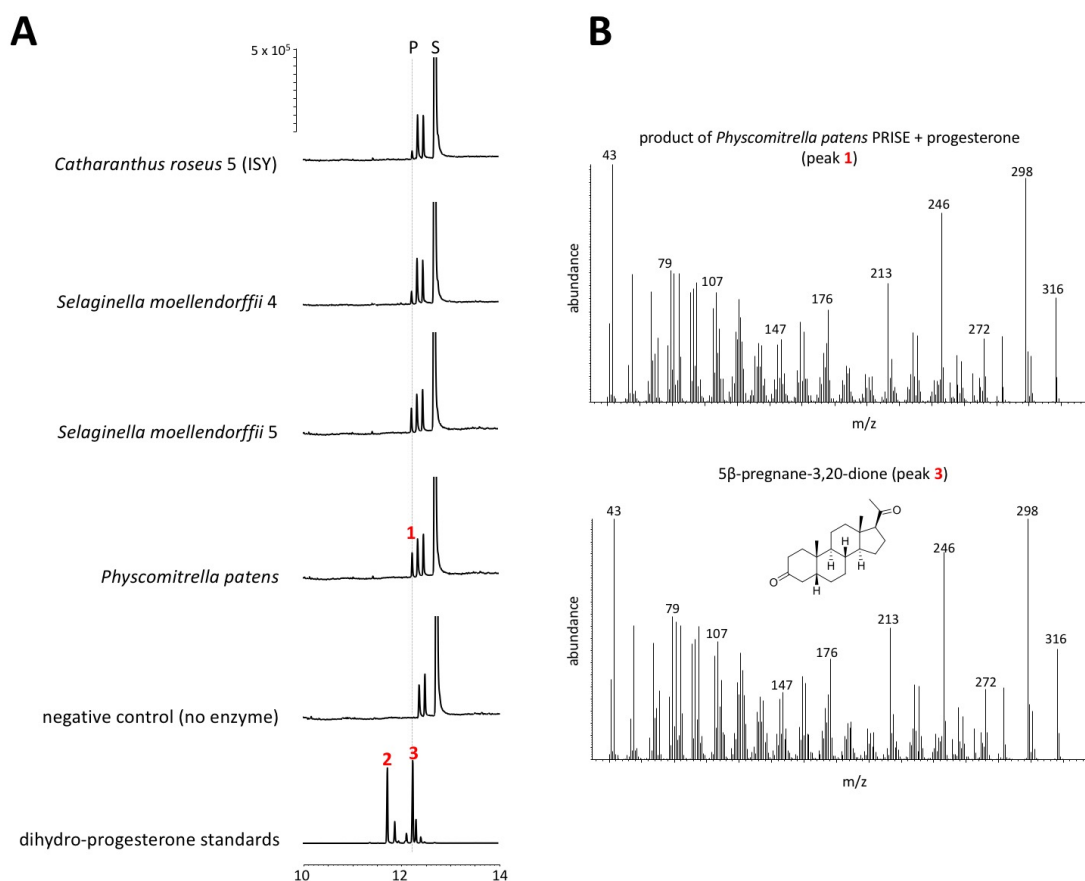

**Figure S3.** GC-MS analysis of activities on progesterone by selected PRISEs

A: GC-MS chromatograms of assays with product levels too low be observed on the normalized scale used in Figure 3. S: substrate. P: expected product.

B: EI mass spectrum comparison between authentic standard of 5 $\beta$ -pregnane-3,20-dione (5 $\beta$ -dihydroprogesterone) and product by PRISE from the moss *Physcomitrella patens*.

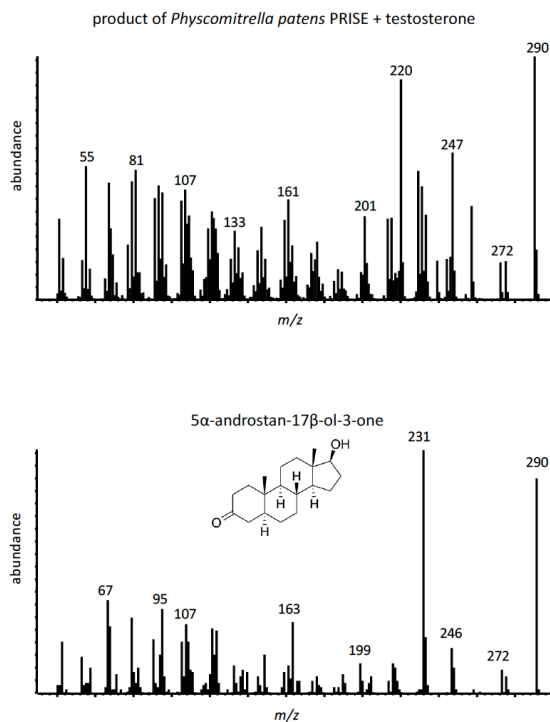

**Figure S4.** EI mass spectrum comparison between authentic standard of 5 $\alpha$ -androstan-17 $\beta$ -ol-3-one (5 $\alpha$ -dihydrotestosterone) (bottom) with the product from the assay of *Physcomitrella patens* (moss) PRISE with testosterone (top). Results indicated that reduction occurred but the product was not 5 $\alpha$ -dihydrotestosterone.

## REFERENCES

- (1) Beninger, C. W., Cloutier, R. R., and Grodzinski, B. (2008) The iridoid glucoside, antirrhinoside, from *Antirrhinum majus* L. has differential effects on two generalist insect herbivores. *J. Chem. Ecol.* *34*, 591–600.
- (2) Sadre, R., Magallanes-Lundback, M., Pradhan, S., Salim, V., Mesberg, A., Jones, A. D., and Dellapenna, D. (2016) Metabolite diversity in alkaloid biosynthesis: A multilane (diastereomer) highway for camptothecin synthesis in *Camptotheca acuminata*. *Plant Cell* *28*, 1926–1944.
- (3) Miettinen, K., Dong, L., Navrot, N., Schneider, T., Burlat, V., Pollier, J., Woittiez, L., Van Der Krol, S., Lugan, R., Ilc, T., Verpoorte, R., Oksman-Caldentey, K. M., Martioia, E., Bouwmeester, H., Goossens, A., Memelink, J., and Werck-Reichhart, D. (2014). The seco-iridoid pathway from *Catharanthus roseus*. *Nat. Commun.* *5*, 3606.
- (4) Agrawal, A. A., Petschenke, G., Bingham, R. A., Marjorie, W. G., Rasmann, S. (2011) Toxic cardenolides: Chemical ecology and coevolution of specialized plant–herbivore interactions. *New Phytol.* *194*, 28–45.
- (5) Makarevich, I. F., Zhernoklev, K. V., Slyusarskaya, T. V., and Yarmolenko, G. N. (1994) Cardenolide-containing plants of the family Cruciferae. *Chem. Nat. Compd.* *30*, 275–289.
- (6) Sherden, N. H., Lichman, B., Caputi, L., Zhao, D., Kamileen, M. O., Buell, C. R., and O'Connor, S. E. (2018) Identification of iridoid synthases from *Nepeta* species: Iridoid cyclization does not determine nepetalactone stereochemistry. *Phytochemistry* *145*, 48–56.
- (7) Obied, H. K., Prenzler, P. D., Ryan, D., Servili, M., Taticchi, A., Esposto, S., and Robards, K. (2008) Biosynthesis and biotransformations of phenol-conjugated oleosidic secoiridoids from *Olea europaea* L. *Nat. Prod. Rep.* *25*, 1167–1179.
- (8) Fuji, Y., Uchida, A., Fukahori, K., Chino, M., Ohtsuki, T., and Matsufuji, H. (2018) Chemical characterization and biological activity in young sesame leaves (*Sesamum indicum* L.) and changes in iridoid and polyphenol content at different growth stages. *PLoS One* *13*, 1–15.
- (9) Matasci, N., Hung, L. H., Yan, Z., Carpenter, E. J., Wickett, N. J., Mirarab, S., Nguyen, N., Warnow, T., Ayyampalayam, S., Barker, M., Burleigh, J. G., Gitzendanner, M. A., Wafula, E., Der, J. P., dePamphilis, C. W., Roure, B., Philippe, H., Ruhfel B. R., Miles, N. W., Graham, S. W., Mathews, S., Surek, B., Melkonian, M., Soltis, D. E., Soltis, P. S., Rothfels, C., Pokorny, L., Shaw, J. A., DeGironimo, L., Stevenson, D. W., Villarreal, J. C., Chen, T., Kutchan, T. M., Rolf, M., Baucom, R. S., Deyholos, M. K., Samudrala, R., Tian, Z., Wu, X., Sun, X., Zhang, Y., Wang, J., Leebens-Mack, J., and Wong, G. K. S. (2014) Data access for the 1,000 Plants (1KP) Project. *Gigascience* *3*, 1–10.
- (10) Bowman, J. L., Kohchi, T., Yamato, K. T., Jenkins, J., Shu, S., Ishizaki, K., Yamaoka, S., Nishihama, R., Nakamura, Y., Berger, F., Adam, C., Aki, S. S., Althoff, F., Araki, T., Arteaga-Vazquez, M. A., Balasubramanian, S., Barry, K., Bauer, D., Boehm, C. R., Briginshaw, L., Caballero-Perez, J., Catarino, B., Chen, F., Chiyoda, S., Chovatia, M., Davies, K. M., Delmans, M., Demura, T., Dierschke, T., Dolan, L., Dorantes-Acosta, A. E., Eklund, D. M., Florent, S. N., Flores-Sandoval, E., Fujiyama, A., Fukuzawa, H., Galik, B., Grimanelli, D., Grimwood, J., Grossniklaus, U., Hamada, T., Haseloff, J., Hetherington, A. J., Higo, A., Hirakawa, Y., Hundley, H. N., Ikeda, Y., Inoue, K., Inoue, S. I., Ishida, S., Jia, Q., Kakita, M., Kanazawa, T., Kawai, Y., Kawashima, T., Kennedy, M., Kinose, K., Kinoshita, T., Kohara, Y., Koide, E., Komatsu, K., Kopschke, S., Kubo, M., Kyojuka, J., Lagercrantz, U., Lin, S. S., Lindquist, E., Lipzen, A. M., Lu, C. W., De Luna, E., Martienssen, R. A., Minamino, N., Mizutani, M., Mizutani, M., Mochizuki, N., Monte, I., Mosher, R., Nagasaki, H., Nakagami, H., Naramoto, S., Nishitani, K., Ohtani, M., Okamoto, T., Okumura, M., Phillips, J., Pollak, B., Reinders, A., Rövekamp, M., Sano, R., Sawa, S., Schmid, M. W., Shirakawa, M., Solano, R., Spunde, A., Suetsugu, N., Sugano, S., Sugiyama, A., Sun, R., Suzuki, Y., Takenaka, M., Takezawa, D., Tomogane, H., Tsuzuki, M., Ueda, T., Umeda, M., Ward, J. M., Watanabe, Y., Yazaki, K., Yokoyama, R., Yoshitake, Y., Yotsui, I., Zachgo, S., and Schmutz, J. (2017). Insights into land plant evolution garnered from the *Marchantia polymorpha* genome. *Cell* *171*, 287–304.e15.
- (11) Geu-Flores, F., Sherden, N. H., Courdavault, V., Burlat, V., Glenn, W. S., Wu, C., Nims, E., Cui, Y., and O'Connor, S. E. (2012) An alternative route to cyclic terpenes by reductive cyclization in iridoid biosynthesis. *Nature* *492*, 138–142.
- (12) Kries, H., Kellner, F., Kamileen, M. O., and O'Connor, S. E. (2017). Inverted stereocontrol of iridoid synthase in snapdragon. *J. Biol. Chem.* *292*, 14659–14667.
